# High Mobility Group Box 1 enhances ADP-mediated platelet activation by increasing platelet surface P2Y<sub>12</sub> localization

Deirdre Nolfi-Donagan<sup>1,3,4</sup>, Gowtham K Annarapu<sup>4</sup>, Lisa M Maurer<sup>1,3</sup>, Cheryl A Hillery<sup>1,3</sup>, and Sruti Shiva<sup>2,4\*</sup>,

<sup>1</sup>*Department of Pediatrics, Division of Hematology/Oncology, Children's Hospital of Pittsburgh, Pittsburgh, PA, USA, 15224*

<sup>2</sup>*Department of Pharmacology & Chemical Biology, University of Pittsburgh, Pittsburgh, PA, 15261, USA*

<sup>3</sup>*University of Pittsburgh School of Medicine, Pittsburgh, PA, USA, 15621*

<sup>4</sup>*Heart, Lung, Blood Vascular Medicine Institute, University of Pittsburgh, Pittsburgh, PA, USA, 15261*

\*Corresponding:

Sruti Shiva, PhD

E1220 Thomas E. Starzl Biomedical Science Tower

200 Lothrop Street, Pittsburgh, PA 15213

Phone 412-383-5854

Fax 412-648-5980

E-mail address: sss43@pitt.edu

**Short Title:** HMGB1 enhances ADP-mediated platelet activation

**WORD COUNT**

**Abstract = 202**

**Introduction + Methods + Results + Discussion = 3226**

**NUMBER OF FIGURES = 6**

**NUMBER OF REFERENCES = 69**

## **Key Points**

- HMGB1 enhances ADP-mediated platelet activation but not platelet activation stimulated by collagen or thrombin.
- HMGB1 stimulates platelet ADP release and increases platelet surface localization of P2y12 receptors via TLR4-dependent mechanism(s).

## **Abstract (Word Count = 202)**

Thrombosis and inflammation are intimately linked and synergistically contribute to the pathogenesis of a number of vascular diseases. On a cellular level, while the platelet is central to thrombus formation as well as an active mediator of inflammation, the molecular mechanisms of cross-talk between thrombosis and inflammation remain elusive. High-Mobility Group Box 1 protein (HMGB1) is an inflammatory regulator that also stimulates platelet activation through its interaction with toll-like receptor 4 (TLR4). However, it remains unclear whether cross-talk between HMGB1 and traditional thrombotic agonists exists to modulate platelet activation. Using isolated human platelets, we tested whether HMGB1 treatment affects platelet activation mediated by traditional agonists. We found that HMGB1 enhances ADP-mediated platelet activation, but not platelet activation stimulated by thrombin or collagen. Further, inhibition of the canonical ADP purinergic P2Y<sub>12</sub> receptor attenuates HMGB1-dependent platelet activation. Mechanistically, we discovered that HMGB1 activates platelet surface TLR4 to release ADP from the platelet and concomitantly increase the localization of P2Y<sub>12</sub> on the platelet membrane. These data demonstrate that ADP-dependent P2Y<sub>12</sub> activation contributes to HMGB1 mediated platelet activation, while HMGB1 primes platelets for an enhanced activation response to ADP. These novel findings further our understanding of thrombo-inflammatory signaling and provide new insight for therapeutic P2Y<sub>12</sub> inhibition.

## **Introduction**

Inflammation and thrombosis are intimately linked, and the platelet represents a cellular mediator of thrombus formation as well as a sentinel for inflammatory signaling<sup>1,2</sup>. To this end, enhanced platelet activation characterizes many acute and chronic inflammatory states including diabetes<sup>3</sup>, sickle cell disease<sup>4,5</sup>, sepsis<sup>6</sup>, and trauma<sup>7</sup>, and likely contributes to the thrombotic complications observed in these conditions. Despite this recognition, the mechanisms of cross-talk between inflammatory and thrombotic stimuli that potentiate platelet activation remain elusive.

High-mobility group box 1 (HMGB1) is a highly-conserved 215 amino acid DNA-binding protein that also functions as a damage-associated molecular pattern protein to mediate sterile inflammation<sup>8</sup>. HMGB1 is increased in many inflammatory diseases including cancer, sepsis, sickle cell disease, autoimmune disease, and trauma<sup>3,9-15</sup>, which are associated with high thrombotic risk and high platelet reactivity<sup>16-18</sup>. Platelets, similar to other cell types, store HMGB1 and release it or present it on their surface<sup>19</sup> upon activation<sup>18,20,21,17</sup>. Surface expression of HMGB1 enables platelet inflammatory signaling through the formation of aggregates with monocytes or neutrophils to form neutrophil extracellular traps<sup>22</sup>, while HMGB1 activation of toll-like receptor 4 (TLR4) on the platelet surface activates the NOD-, LRR- and pyrin domain-containing protein 3 (NLRP3) inflammasome<sup>23</sup> and stimulates the production of platelet-derived microparticles<sup>18</sup>. In addition to its inflammatory signaling, accumulating evidence suggests HMGB1 also mediates thrombosis. For example, platelet surface HMGB1 accelerates the rate of plasminogen activation and promotes the generation of surface-bound plasmin<sup>19,24,25</sup>, and

exogenous HMGB1 increases the speed and area of human platelet spread on collagen<sup>17</sup>. Consistent with this, mice with platelet-specific knockout of HMGB1 display decreased platelet activation, aggregation, and thrombus formation, while administration of recombinant HMGB1 restores their ability to form a thrombus<sup>17,26</sup>. On a mechanistic level, HMGB1 is redox-regulated, and depending on its oxidation state, has been shown to stimulate platelet activation predominantly through TLR4 or the receptor for advanced glycation endproducts (RAGE)<sup>17,22,27-30</sup>. These studies demonstrate that HMGB1 can directly stimulate platelet activation; however it remains unclear whether this inflammatory protein also acts synergistically with other traditional platelet agonists to potentiate platelet activation during inflammation.

Adenosine diphosphate (ADP), stored in platelet dense granules, is a weak platelet agonist when released. Despite this, through activation of purinergic receptors, specifically P2Y<sub>12</sub>, P2X<sub>1</sub>, and P2Y<sub>1</sub>, ADP is essential for mediating calcium influx and activation of the platelet along with shape change and potentiation of aggregation<sup>31</sup>. Inhibitors of purinergic receptors, particularly P2Y<sub>12</sub>, are potent inhibitors of platelet thrombotic function and are thus utilized clinically as prophylaxis in cardiovascular disease and embolic stroke<sup>32</sup>. Notably, several studies have implicated P2Y<sub>12</sub> receptors in modulating inflammatory responses. For example, mice or patients receiving P2Y<sub>12</sub> antagonists show decreased levels of inflammatory markers including circulating CD40 ligand<sup>33-35</sup>, interleukin-6<sup>36</sup>, C-reactive protein<sup>37,38</sup>, and platelet-leukocyte aggregates<sup>39</sup>. Despite this recognition, it remains unknown whether inflammatory signaling molecules, such as HMGB1 directly regulate P2Y<sub>12</sub> expression or function.

Herein, we tested whether HMGB1 synergizes with traditional platelet agonists to mediate platelet activation. We demonstrate that HMGB1 potentiates platelet activation mediated by ADP. Mechanistically, HMGB1, through the activation of TLR4, upregulates P2Y<sub>12</sub> at the platelet surface via dynein-dependent transport. The implications of these studies will be discussed in the context of thrombo-inflammatory signaling and therapeutic inhibition of P2Y<sub>12</sub> receptors.

## **Materials and Methods**

### **Blood draw and platelet isolation**

This study was approved by the institutional review board of the University of Pittsburgh. Written informed consent was obtained from all participants. Participants were greater than 18 years old and were excluded if they were pregnant, or taking anti-platelet or anti-coagulant medications. Blood was collected in sodium citrate by standard venipuncture using a light tourniquet or no tourniquet. To isolate platelets as previously described<sup>5</sup>, whole blood samples were centrifuged (500g for 20 minutes, 25°C) to obtain platelet-rich plasma (PRP). The PRP was centrifuged (1500g for 10 minutes, 25°C) in the presence of PGI<sub>2</sub> (1 µg/mL) to separate a platelet pellet from platelet-poor plasma (PPP). The PPP was removed, and the platelets were washed in erythrocyte lysis buffer containing PGI<sub>2</sub>. The platelet suspension was centrifuged a third time (1500g for 5 minutes, 25°C) to isolate a platelet pellet. The supernatant was removed, and the isolated platelets were resuspended in modified Tyrodes buffer (20 mmol/L HEPES, 128 mmol/L NaCl, 12 mmol/L bicarbonate, 0.4 mmol/L NaH<sub>2</sub>PO<sub>2</sub>, 5 mmol/L glucose, CaCl<sub>2</sub> 3 mmol/L, 1 mmol/L MgCl<sub>2</sub>, 2.8 mmol/L KCl, pH 7.4). Platelet purity was confirmed by flow cytometric measurement of CD41a expression.

### **Treatments of Isolated Platelets**

Isolated human platelets were incubated at room temperature for 15-20 minutes with either recombinant HMGB1 (0-40 µg/ml; R&D Systems), ADP (0-5 µM; Bio/Data Corporation), collagen (0-50 µg/ml, Bio/Data Corporation), thrombin enzyme (0.1 U/ml; Sigma-Aldrich), or matched volume of platelet buffer. In select assays involving inhibition of proteins within the TLR4 signaling pathway<sup>40</sup>, ADP receptor signaling pathways, or

cytosolic trafficking, isolated platelets were pre-treated with an inhibitor for 15-30 minutes, followed by 20 minutes of incubation with agonist. Targets for inhibition were TLR4 (anti-TLR4 IgG, 1 µg/ml; Invivogen); interleukin-1 receptor-associated kinase 1 and 4 (IRAK 1/4; IRAK 1/4 inhibitor, 0.1 µM; Tocris); TANK-binding kinase 1 (TBK1) and IκB kinase ε (IKKε; BX795, 2 µM; Invivogen); receptor for advanced glycation end products (RAGE; FPS-ZM1, 25 µM; Calbiochem); P2Y<sub>1</sub> (MRS 2500, 1 nM; Tocris); P2Y<sub>12</sub> (AR-C 66096, 1 µM; Tocris); cytoplasmic dynein (dynarrestin, 50 µM; Sigma-Aldrich and ciliobrevin A, 10 µM; R&D Systems); and β-tubulin (nocodazole, 2 µM; Sigma-Aldrich).

### **Measurement of ADP released by platelets**

ADP released into the supernatant from human platelets was quantified with an ADP ELISA Kit (Biovision ADP Colorimetric Assay Kit, #K355) according to the manufacturer's instructions.

### **Flow Cytometry Analysis**

Platelet suspensions (85k cells/µL) were fixed on ice with a solution of 1% paraformaldehyde and incubated with fluorescent antibody to platelet markers CD41a (BD Biosciences #555467), activated integrin αIIbβ3 (BD Biosciences #340507), CD62P (BD Biosciences #550888), and P2Y<sub>12</sub> (Biolegend #392108) for measurement by flow cytometry as previously described<sup>5,41</sup>. In addition to fluorescent markers, platelets were gated using forward and side scatter. Flow cytometry data were acquired using a BD-Fortessa fluorescence-activated cell sorter (FACS) Diva Software (Becton Dickinson) and analyzed using Flowjo version 10.0 software.



Measurement of platelet activation: Platelet suspensions were labeled with phycoerythrin (PE)-labeled mouse anti-human CD41a ab (anti-GPIIb; BD Biosciences) to gate platelets, and either FITC-labeled PAC1 ab (BD Biosciences) to detect the activation-dependent conformational change in platelet receptor integrin  $\alpha\text{IIb}\beta\text{3}$  (GP IIb-IIIa), or with APC-labeled CD62P antibody to bind activation-dependent exposure of P-selectin.

Quantification of P2Y<sub>12</sub> surface levels: In select assays, phycoerythrin (PE)-labeled mouse anti-human CD41a ab was used to gate platelets and FITC-labeled monoclonal P2RY<sub>12</sub> antibody (anti-P2Y<sub>12</sub>, Biolegend) was used to detect surface expression of platelet P2Y<sub>12</sub>.

### **Platelet P2Y<sub>12</sub> Quantification by Western Blot**

Western blotting was performed by standard procedure<sup>42</sup> using anti-P2Y<sub>12</sub> ab (Invitrogen #702516) following cell lysis of platelets. Semiquantitative analysis of images captured by chemiluminescence on a Kodak X-OMAT 2000 Processor was performed using Image Lite software.

### **Statistical analysis**

The unpaired parametric t-test and ANOVA were used to compare individual group samples and to compare the differences between treatments and controls. Statistical analyses were performed using Prism 9 software. P-values <0.05 were considered significant. Data are presented as mean  $\pm$  standard error of the mean (SEM) unless otherwise specified.

## **Results**

**HMGB1 enhances ADP-dependent platelet activation.** In the first series of experiments we measured the effect of recombinant HMGB1 (0-40  $\mu\text{g/ml}$ ) on the activation of isolated platelets by measuring surface P-selectin expression (**Figure 1A**) and activation-dependent conformation of integrin  $\alpha\text{IIb}\beta\text{3}$  (**Figure 1B**). Consistent with prior studies, both markers showed a concentration-dependent increase, confirming that HMGB1 directly activates platelets. To determine whether HMGB1 potentiates activation stimulated by other traditional platelet agonists, we pre-treated isolated platelets with HMGB1 (10  $\mu\text{g/ml}$ ) before incubating with the known endogenous platelet agonists thrombin (0, 0.025, and 0.1 U/ml; **Figure 1C**), collagen (0, 5, and 50  $\mu\text{g/ml}$ ; **Figure 1D**), and ADP (0, 0.5, and 5  $\mu\text{M}$ ; **Figure 1E**). HMGB1 pre-treatment had no significant effect on collagen- or thrombin-dependent platelet activation compared to collagen or thrombin alone. However, pre-treatment with HMGB1 significantly potentiated ADP-mediated platelet activation, with HMGB1 increasing platelet activation mediated by 0.5  $\mu\text{M}$  ADP by 7-fold ( $P=0.0023$ ; **Figure 1E**). These data demonstrate that HMGB1 not only independently stimulates platelet activation, but also potentiates ADP-dependent platelet activation.

**Inhibition of TLR4 and P2Y<sub>12</sub> receptor attenuates HMGB1-dependent platelet activation.** To determine the mechanism by which HMGB1 potentiates ADP-dependent activation, we next tested which platelet surface receptors were required for HMGB1- and ADP-dependent platelet activation. Using pharmacologic inhibitors, we first targeted the RAGE and TLR4 receptors, which are the two predominant platelet receptors previously

described to be activated by HMGB1<sup>17,25,43,44</sup> (**Figure 2A**). Measurement of surface P-selectin showed that neither inhibition of RAGE by FPS-ZM1 or TLR4 using anti-TLR4 Ab had any effect on ADP-mediated platelet activation (**Figure 2B**). Inhibition of RAGE similarly had no effect on platelet activation mediated by HMGB1 alone or HMGB1+ADP together (**Figure 2B**). However, platelet activation induced by HMGB1 alone or HMGB1+ADP was significantly decreased by TLR4 inhibition ( $P=0.016$  and  $P=0.0005$  respectively; **Figure 2B**).

Since it is well-established that ADP signals through purinergic receptors<sup>31</sup>, we next tested the effect of MRS 2500 and AR-C66096, antagonists of the P2Y<sub>1</sub> and P2Y<sub>12</sub> receptors respectively, on ADP- and HMGB1-dependent platelet activation (**Figure 2C**). Platelets were pre-treated with these inhibitors and then stimulated with ADP, HMGB1, or with HMGB1+ADP (**Figure 2D**). As expected, blocking P2Y<sub>1</sub>, which signals platelet shape change but not sustained activation of integrin  $\alpha\text{IIb}\beta\text{3}$  or P-selectin expression<sup>45</sup>, had no significant effect on platelet activation mediated by ADP ( $P=0.4127$ ), HMGB1 ( $P=0.9798$ ) or HMGB1+ADP ( $P=0.5457$ ) (**Figure 2D**). In contrast, blocking P2Y<sub>12</sub> reduced ADP-mediated platelet activation ( $P=0.0010$ ) and reduced HMGB1+ADP-mediated activation by nearly 2-fold ( $P=0.0001$ ) (**Figure 2D**). Surprisingly, blocking P2Y<sub>12</sub> also attenuated platelet activation mediated by HMGB1 in the absence of ADP ( $P=0.0199$ ). Moreover, simultaneously inhibiting both P2Y<sub>12</sub> and TLR4 signaling with AR-C 66096 plus inhibitors of IRAK1/4 or TBK (the major downstream kinases activated by TLR4) caused a further reduction of HMGB1- and HMGB1+ADP-mediated platelet activation as measured by surface P-selectin expression (**Figure 2E**). Importantly, none of the

inhibitors utilized had any effect on thrombin-mediated platelet activation, confirming the lack of non-specific effects of the antagonists. Similar results were observed using integrin  $\alpha\text{IIb}\beta\text{3}$  as a marker of platelet activation (**Supplementary Figure**). These data demonstrate that in addition to TLR4, P2Y<sub>12</sub> receptors regulate HMGB1-mediated platelet activation.

**HMGB1 stimulates platelet ADP release.** Platelets contain significant concentrations of ADP that may be released upon activation. Thus, we next tested whether HMGB1 stimulates ADP release from platelets, which then can bind P2Y<sub>12</sub> to potentiate platelet activation. We first measured ADP concentration in the supernatant surrounding HMGB1-treated platelets, and found ADP concentration to be elevated compared with untreated platelets (**Figure 3A**). Pre-treatment of platelets with the TLR4 blocking antibody attenuated HMGB1-induced ADP release ( $P=0.003$ ) (**Figure 3A**). These data indicate that HMGB1, through TLR4 activation, promotes the release of endogenous ADP from platelets.

To test whether the released ADP potentiated HMGB1-mediated platelet activation, we treated platelets with HMGB1 in the presence and absence of apyrase, to degrade secreted ADP. We found that HMGB1-dependent platelet activation was attenuated by more than 2-fold in the presence of apyrase ( $P=0.041$ ), suggesting that platelet-derived ADP importantly contributes to HMGB1-mediated activation (**Figure 3B**). Next, we incubated platelets with HMGB1 and then washed the platelets to remove HMGB1 and endogenous platelet-derived ADP from the suspension. Treatment of these washed

platelets with exogenous ADP (5  $\mu$ M) showed the same level of activation as exogenous HMGB1+ADP when added simultaneously (**Figure 3C**). Taken together, these data demonstrate that endogenous ADP release contributes to HMGB1-dependent platelet activation, and that HMGB1 also “primes” platelets for an enhanced response to ADP-stimulated activation.

**HMGB1 increases P2Y<sub>12</sub> localization at the platelet surface.** To determine the mechanism by which HMGB1 potentiates ADP-dependent platelet activation, we examined surface P2Y<sub>12</sub> receptor levels by flow cytometry. We measured platelet surface P2Y<sub>12</sub> levels before and after (20 min) treatment with ADP alone, HMGB1 alone, or HMGB1+ADP. Compared to untreated platelets, there was no significant change in surface P2Y<sub>12</sub> with ADP treatment alone (P=0.44). However, stimulation with HMGB1 alone or with HMGB1+ADP resulted in a significant increase in platelet surface P2Y<sub>12</sub> levels compared with untreated platelets (P<0.0001) (**Figure 4A**). Consistent with these data, HMGB1 alone induced an increase in platelet P2Y<sub>12</sub> surface levels in a concentration-dependent manner (P<0.0001) (**Figure 4B**). Notably, inhibitors of the TLR4-dependent signaling molecules IRAK 1/4 (P=0.0006) and TBK1 (P=0.02) both attenuated HMGB1-stimulated increased platelet surface P2Y<sub>12</sub> (**Figure 4C**).

**HMGB1-induced P2Y<sub>12</sub> transportation to the platelet surface is mediated by dynein.**

To determine whether the HMGB1-induced P2Y<sub>12</sub> surface increase was due to *de novo* protein synthesis or inhibition of proteosomal degradation, we pre-treated platelets with either cycloheximide (20  $\mu$ M; 30 min) to inhibit protein translation or MG-132 (30  $\mu$ M; 30

min) to inhibit protein degradation, prior to HMGB1 treatment, and then total platelet P2Y<sub>12</sub> expression was measured by Western blot. HMGB1 had no effect on total platelet P2Y<sub>12</sub> levels at baseline or after treatment with cycloheximide or MG-132 (**Figure 5**). These data indicate that HMGB1 does not alter whole platelet P2Y<sub>12</sub> synthesis or degradation.

Given that HMGB1 does not alter total P2Y<sub>12</sub> protein synthesis, we next asked whether HMGB1 increases transport of P2Y<sub>12</sub> to the platelet surface. Dynarrestin and ciliobrevin A, both small molecule inhibitors of cytoplasmic dynein, were used to disrupt dynein-mediated translocation to the surface. Pre-treatment with either dynarrestin or ciliobrevin A significantly attenuated HMGB1-dependent localization of P2Y<sub>12</sub> at the platelet surface (P=0.0017 for dynarrestin, P=0.0011 for ciliobrevin) (**Figure 6A**). Similarly, treatment with nocodazole, an inhibitor of  $\beta$ -tubulin-associated microtubule polymerization, which is required for dynein-mediated transport, also decreased HMGB1-dependent surface P2Y<sub>12</sub> levels (P=0.001) (**Figure 6A**). Measurement of platelet activation in the presence of the inhibition of cytoplasmic dynein or microtubule polymerization had no effect on ADP-mediated platelet activation. However, inhibition of P2Y<sub>12</sub> transport significantly attenuated platelet activation stimulated by HMGB1 alone and abolished the HMGB1-mediated sensitization of platelets to ADP (**Figure 6B-C**). These data demonstrate that HMGB1 promotes dynein-dependent mobilization of P2Y<sub>12</sub> from internal stores to the platelet surface, and that dynein-dependent transport not only contributes to HMGB1-induced platelet activation, but also underlies the HMGB1-mediated sensitization of platelets to ADP.

## **Discussion**

In this study, we show for the first time that HMGB1 and ADP synergize to enhance platelet activation. HMGB1-dependent TLR4 activation releases endogenous ADP from the platelet, which potentiates the platelet activation mediated by HMGB1. Concomitantly, HMGB1 increases transport of P2Y<sub>12</sub> receptors to the platelet surface, which “primes” the platelet for an enhanced activation response to ADP. These findings illustrate a novel mechanism by which P2Y<sub>12</sub> receptors are involved in inflammatory signaling, as well as a new line of synergy between the inflammatory and thrombotic pathways.

Our study confirms prior work demonstrating that HMGB1 induces platelet activation in a TLR4-dependent manner<sup>17,23,29,30</sup>. We further demonstrate that this activation is partially dependent on TLR4-mediated ADP release and P2Y<sub>12</sub> activation. These data put HMGB1 in the ranks of other platelet agonists such as thrombin and collagen, which stimulate release of endogenous platelet-derived ADP to fuel feed-forward platelet activation and aggregation through P2Y<sub>12</sub><sup>46,47</sup>. Although ADP is considered a relatively weak physiologic agonist, it is essential for recruiting and cross-linking additional platelets<sup>45,48,49</sup> and stabilizing the outer shell of the platelet plug<sup>50</sup>. While prior studies have shown that lipopolysaccharide (LPS), a strong TLR4 agonist, induces platelet dense and α-granule release<sup>51</sup>, P2Y<sub>12</sub> inhibition has shown mixed results on LPS-induced platelet activation and coagulation<sup>52-55</sup>. Our data showing an approximately 50% decrease in HMGB1-induced platelet activation in the presence of P2Y<sub>12</sub> inhibition may serve as a new

foundation for studies investigating differences in LPS and HMGB1-mediated platelet signaling.

Our data demonstrate that HMGB1 primes platelets to ADP-induced activation; this is consistent with a prior study in which HMGB1 caused increased sensitivity to ADP-stimulated platelet aggregation<sup>22</sup>. We extend these studies to demonstrate that HMGB1-stimulated P2Y<sub>12</sub> receptor transport mechanistically underlies this priming effect. Human platelets express P2Y<sub>12</sub> both on their surface and in an inducible pool within the platelet that can be rapidly mobilized<sup>56</sup>. It is estimated that about half the quantity of platelet P2Y<sub>12</sub> is found on the plasma surface membrane and in open canalicular system at all times<sup>57</sup>, but the mechanisms that regulate platelet P2Y<sub>12</sub> surface expression are not fully elucidated<sup>58</sup>. Here we show that HMGB1 stimulates transport of P2Y<sub>12</sub> to the platelet surface, and this transport is partially dependent on TLR4 signaling and dynein activity. While it has been demonstrated that LPS increases expression of P2Y<sub>12</sub> on macrophages<sup>59</sup>, this type of TLR4-dependent regulation of the purinergic receptor has not been described in the platelet or with any other TLR4 ligand. Further study is required to delineate the molecular link between TLR4 activation and the regulation of dyneins. Of note, phosphorylation and translocation of these motor proteins within the platelet has been shown to occur after activation<sup>60</sup>, suggesting that perhaps TLR4-dependent phosphorylation may play a role in P2Y<sub>12</sub> translocation.

Beyond thrombotic signaling, our data provide a potential mechanistic link for the growing number of studies that implicate P2Y<sub>12</sub> in inflammatory signaling<sup>61,62</sup>. The platelet is an established sentinel of inflammatory signaling that not only synthesizes, stores, and



releases chemokines and cytokines, but also interacts with and activates leukocytes to propagate inflammatory signaling<sup>63</sup>. Notably, genetic or pharmacologic inhibition of P2Y<sub>12</sub> has been shown in both murine models and human studies to decrease levels of circulating inflammatory mediators such as TNF- $\alpha$ , IL-10, IL-6 and MIP-1 $\beta$ ,<sup>62</sup> and attenuate the release of soluble CD40 ligand<sup>33</sup>. Further, P2Y<sub>12</sub> inhibition has attenuated platelet-neutrophil aggregates and neutrophil extracellular trap formation in multiple models of LPS-induced inflammation<sup>64-66</sup>. Consistent with this, P2Y<sub>12</sub> inhibition has shown beneficial effects in clinical studies of patients with inflammatory syndromes including pneumonia and sepsis<sup>61,67</sup>. Mechanisms underlying the P2Y<sub>12</sub>-mediated attenuation of inflammation remain elusive, and have been predominantly investigated in LPS-induced inflammatory models<sup>64,66</sup>. Our data showing HMGB1-induced ADP release and increased P2Y<sub>12</sub> surface expression under the control of TLR4 provide a novel mechanism of P2Y<sub>12</sub> regulation of platelet inflammatory signaling. Additionally, given that LPS can induce the release of HMGB1 to potentiate inflammatory signaling, the data presented here provide a rationale to delineate the cross-talk between different TLR4 agonists and ADP-dependent signaling. Moreover, these data suggest that P2Y<sub>12</sub> activity and expression potentially play a significant role in the propagation of sterile inflammation.

Pharmacologic inhibitors of P2Y<sub>12</sub> are widely used therapeutically for a number of pathologies ranging from cardiovascular diseases to sepsis, and rates of resistance to therapeutic P2Y<sub>12</sub> inhibition have been reported as high as 30% in patients treated with clopidogrel<sup>68</sup>. It is interesting to consider whether HMGB1-induced P2Y<sub>12</sub> surface localization potentially underlies resistance, particularly in patients with inflammatory

disease. Consistent with this idea, Haberstock-Debic et al<sup>69</sup> previously showed that platelet stimulation with strong agonists such as thrombin significantly increase surface P2Y<sub>12</sub> expression, and this increased expression was associated with resistance to clopidogrel and could be reversed by elinogrel, a P2Y<sub>12</sub> inhibitor with longer half-life which was able to antagonize the higher levels of receptors expressed. In pathologies with inflammatory components, acute HMGB1 release from the platelet or other cells could potentially confer resistance to purinergic antagonists. However, further studies are required to dissect this signaling pathway both mechanistically and in patients treated with P2Y<sub>12</sub> inhibitors.

In summary, this study shows for the first time that ADP release and P2Y<sub>12</sub> activation contributes to HMGB1-induced platelet activation, and that HMGB1 primes platelets for ADP signaling by increasing P2Y<sub>12</sub> at the platelet surface without invoking new P2Y<sub>12</sub> synthesis. These data present a novel mechanism of cross-talk between inflammatory and thrombotic signaling and have implications for both the therapeutic targeting of HMGB1 and P2Y<sub>12</sub> receptors.

## **ACKNOWLEDGEMENTS**

This work was supported by NIH grants HL130268-03 (to SS), HL128371 (to CAH), and HD071834 (to DND). Additional support was provided by The Hemophilia Center of Western Pennsylvania (to SS), the UPMC Children's Trust Young Investigator Foundation Fund 020284 (to DND), and the Children's Hospital of Pittsburgh Scholars Award (to DND).

## **AUTHORSHIP CONTRIBUTIONS**

DND and SS designed the study. DND performed the research. DND, GKA, LMM, SS, and CAH analyzed the data. DND, SS, and CAH wrote the manuscript.

## **DISCLOSURE OF CONFLICTS OF INTEREST**

The authors have no competing financial interests to disclose.

## **References**

1. Morrell, C.N., Aggrey, A.A., Chapman, L.M. & Modjeski, K.L. Emerging roles for platelets as immune and inflammatory cells. *Blood* **123**, 2759-2767 (2014).
2. Margraf, A. & Zarbock, A. Platelets in Inflammation and Resolution. *J Immunol* **203**, 2357-2367 (2019).
3. Schneider, D.J. Factors contributing to increased platelet reactivity in people with diabetes. *Diabetes Care* **32**, 525-527 (2009).
4. Wun, T., Paglieroni, T., Tablin, F., Welborn, J., Nelson, K. & Cheung, A. Platelet activation and platelet-erythrocyte aggregates in patients with sickle cell anemia. *J Lab Clin Med* **129**, 507-516 (1997).
5. Cardenes, N., Corey, C., Geary, L., Jain, S., Zharikov, S., Barge, S., Novelli, E.M. & Shiva, S. Platelet bioenergetic screen in sickle cell patients reveals mitochondrial complex V inhibition, which contributes to platelet activation. *Blood* **123**, 2864-2872 (2014).
6. Vardon-Bouines, F., Ruiz, S., Gratacap, M.P., Garcia, C., Payrastre, B. & Minville, V. Platelets Are Critical Key Players in Sepsis. *Int J Mol Sci* **20**(2019).
7. Dyer, M.R., Alexander, W., Hassoune, A., Chen, Q., Brzoska, T., Alvikas, J., Liu, Y., Haldeman, S., Plautz, W., Loughran, P., Li, H., Boone, B., Sadovsky, Y., Sundd, P., Zuckerbraun, B.S. & Neal, M.D. Platelet-derived extracellular vesicles released after trauma promote hemostasis and contribute to DVT in mice. *J Thromb Haemost* **17**, 1733-1745 (2019).
8. Andersson, U. & Tracey, K.J. HMGB1 is a therapeutic target for sterile inflammation and infection. *Annu Rev Immunol* **29**, 139-162 (2011).
9. Zago, M.A., Costa, F.F., Ismael, S.J., Tone, L.G. & Bottura, C. Treatment of sickle cell diseases with aspirin. *Acta Haematol* **72**, 61-64 (1984).
10. Wannberg, M., Miao, X., Li, N., Wikman, A. & Wahlgren, C.M. Platelet consumption and hyperreactivity coexist in experimental traumatic hemorrhagic model. *Platelets* **31**, 777-783 (2020).
11. Semple, M.J., Al-Hasani, S.F., Kioy, P. & Savidge, G.F. A double-blind trial of ticlopidine in sickle cell disease. *Thromb Haemost* **51**, 303-306 (1984).
12. Kawai, V.K., Avalos, I., Oeser, A., Oates, J.A., Milne, G.L., Solus, J.F., Chung, C.P. & Stein, C.M. Suboptimal inhibition of platelet cyclooxygenase 1 by aspirin in systemic lupus erythematosus: association with metabolic syndrome. *Arthritis Care Res (Hoboken)* **66**, 285-292 (2014).
13. Heeney, M.M., Hoppe, C.C., Abboud, M.R., Inusa, B., Kanter, J., Ogutu, B., Brown, P.B., Heath, L.E., Jakubowski, J.A., Zhou, C., Zamoryakhin, D., Agbenyega, T., Colombatti, R., Hassab, H.M., Nduba, V.N., Oyieko, J.N., Robitaille, N., Segbefia, C.I., Rees, D.C. & Investigators, D. A Multinational Trial of Prasugrel for Sickle Cell Vaso-Occlusive Events. *N Engl J Med* **374**, 625-635 (2016).
14. Cooke, N.M., Egan, K., McFadden, S., Grogan, L., Breathnach, O.S., O'Leary, J., Hennessy, B.T. & Kenny, D. Increased platelet reactivity in patients with late-stage metastatic cancer. *Cancer Med* **2**, 564-570 (2013).
15. Akinosoglou, K., Theodoraki, S., Xanthopoulou, I., Perperis, A., Gkavogianni, T., Pistiki, A., Giamarellos-Bourboulis, E. & Gogos, C.A. Platelet reactivity in sepsis

syndrome: results from the PRESS study. *Eur J Clin Microbiol Infect Dis* **36**, 2503-2512 (2017).

16. Xu, H., Wandersee, N.J., Guo, Y., Jones, D.W., Holzhauer, S.L., Hanson, M.S., Machogu, E., Brousseau, D.C., Hogg, N., Densmore, J.C., Kaul, S., Hillery, C.A. & Pritchard, K.A., Jr. Sick cell disease increases high mobility group box 1: a novel mechanism of inflammation. *Blood* **124**, 3978-3981 (2014).

17. Vogel, S., Bodenstern, R., Chen, Q., Feil, S., Feil, R., Rheinlaender, J., Schaffer, T.E., Bohn, E., Frick, J.S., Borst, O., Munzer, P., Walker, B., Markel, J., Csanyi, G., Pagano, P.J., Loughran, P., Jessup, M.E., Watkins, S.C., Bullock, G.C., Sperry, J.L., Zuckerbraun, B.S., Billiar, T.R., Lotze, M.T., Gawaz, M. & Neal, M.D. Platelet-derived HMGB1 is a critical mediator of thrombosis. *J Clin Invest* **125**, 4638-4654 (2015).

18. Kang, R., Chen, R., Zhang, Q., Hou, W., Wu, S., Cao, L., Huang, J., Yu, Y., Fan, X.G., Yan, Z., Sun, X., Wang, H., Wang, Q., Tsung, A., Billiar, T.R., Zeh, H.J., 3rd, Lotze, M.T. & Tang, D. HMGB1 in health and disease. *Mol Aspects Med* **40**, 1-116 (2014).

19. Rouhiainen, A., Imai, S., Rauvala, H. & Parkkinen, J. Occurrence of amphoterin (HMG1) as an endogenous protein of human platelets that is exported to the cell surface upon platelet activation. *Thromb Haemost* **84**, 1087-1094 (2000).

20. Maugeri, N., Franchini, S., Campana, L., Baldini, M., Ramirez, G.A., Sabbadini, M.G., Rovere-Querini, P. & Manfredi, A.A. Circulating platelets as a source of the damage-associated molecular pattern HMGB1 in patients with systemic sclerosis. *Autoimmunity* **45**, 584-587 (2012).

21. Janko, C., Filipovic, M., Munoz, L.E., Schorn, C., Schett, G., Ivanovic-Burmazovic, I. & Herrmann, M. Redox modulation of HMGB1-related signaling. *Antioxid Redox Signal* **20**, 1075-1085 (2014).

22. Stark, K., Philippi, V., Stockhausen, S., Busse, J., Antonelli, A., Miller, M., Schubert, I., Hoseinpour, P., Chandraratne, S., von Bruhl, M.L., Gaertner, F., Lorenz, M., Agresti, A., Coletti, R., Antoine, D.J., Heermann, R., Jung, K., Reese, S., Laitinen, I., Schwaiger, M., Walch, A., Sperandio, M., Nawroth, P.P., Reinhardt, C., Jackel, S., Bianchi, M.E. & Massberg, S. Disulfide HMGB1 derived from platelets coordinates venous thrombosis in mice. *Blood* **128**, 2435-2449 (2016).

23. Vogel, S., Arora, T., Wang, X., Mendelsohn, L., Nichols, J., Allen, D., Shet, A.S., Combs, C.A., Quezado, Z.M.N. & Thein, S.L. The platelet NLRP3 inflammasome is upregulated in sickle cell disease via HMGB1/TLR4 and Bruton tyrosine kinase. *Blood Adv* **2**, 2672-2680 (2018).

24. Parkkinen, J., Raulo, E., Merenmies, J., Nolo, R., Kajander, E.O., Baumann, M. & Rauvala, H. Amphoterin, the 30-kDa protein in a family of HMG1-type polypeptides. Enhanced expression in transformed cells, leading edge localization, and interactions with plasminogen activation. *J Biol Chem* **268**, 19726-19738 (1993).

25. Ahrens, I., Chen, Y.C., Topcic, D., Bode, M., Haenel, D., Hagemeyer, C.E., Seeba, H., Duerschmied, D., Bassler, N., Jandeleit-Dahm, K.A., Sweet, M.J., Agrotis, A., Bobik, A. & Peter, K. HMGB1 binds to activated platelets via the receptor for advanced glycation end products and is present in platelet rich human coronary artery thrombi. *Thromb Haemost* **114**, 994-1003 (2015).

26. Dyer, M.R., Chen, Q., Haldeman, S., Yazdani, H., Hoffman, R., Loughran, P., Tsung, A., Zuckerbraun, B.S., Simmons, R.L. & Neal, M.D. Deep vein thrombosis in mice

is regulated by platelet HMGB1 through release of neutrophil-extracellular traps and DNA. *Sci Rep* **8**, 2068 (2018).

27. Ahrens, I., Chen, Y., Topcic, D., Bode, M., Haenel, D., Hagemeyer, C.E., Seeba, H., Dürschmied, D., Bassler, N., Jandeleit-Dahm, K., Sweet, M.J., Agrotis, A., Bobik, A., & Peter, K. . HMGB1 binds to activated platelets via the receptor for advanced glycation end products and is present in platelet rich human coronary artery thrombi. *Thrombosis and haemostasis* **114**, 994-1003 (2015).

28. Gawlowski, T., Stratmann, B., Ruetter, R., Buenting, C.E., Menart, B., Weiss, J., Vlassara, H., Koschinsky, T. & Tschoepe, D. Advanced glycation end products strongly activate platelets. *Eur J Nutr* **48**, 475-481 (2009).

29. Liu, A., Fang, H., Dirsch, O., Jin, H. & Dahmen, U. Oxidation of HMGB1 causes attenuation of its pro-inflammatory activity and occurs during liver ischemia and reperfusion. *PLoS One* **7**, e35379 (2012).

30. He, M., Bianchi, M.E., Coleman, T.R., Tracey, K.J. & Al-Abed, Y. Exploring the biological functional mechanism of the HMGB1/TLR4/MD-2 complex by surface plasmon resonance. *Mol Med* **24**, 21 (2018).

31. Hechler, B. & Gachet, C. P2 receptors and platelet function. *Purinergic Signal* **7**, 293-303 (2011).

32. Damman, P., Woudstra, P., Kuijt, W.J., de Winter, R.J. & James, S.K. P2Y12 platelet inhibition in clinical practice. *J Thromb Thrombolysis* **33**, 143-153 (2012).

33. Judge, H.M., Buckland, R.J., Holgate, C.E. & Storey, R.F. Glycoprotein IIb/IIIa and P2Y12 receptor antagonists yield additive inhibition of platelet aggregation, granule secretion, soluble CD40L release and procoagulant responses. *Platelets* **16**, 398-407 (2005).

34. Xiao, Z. & Theroux, P. Clopidogrel inhibits platelet-leukocyte interactions and thrombin receptor agonist peptide-induced platelet activation in patients with an acute coronary syndrome. *J Am Coll Cardiol* **43**, 1982-1988 (2004).

35. Harding, S.A., Sarma, J., Din, J.N., Maciocia, P.M., Newby, D.E. & Fox, K.A. Clopidogrel reduces platelet-leukocyte aggregation, monocyte activation and RANTES secretion in type 2 diabetes mellitus. *Heart* **92**, 1335-1337 (2006).

36. Antonino, M.J., Mahla, E., Bliden, K.P., Tantry, U.S. & Gurbel, P.A. Effect of long-term clopidogrel treatment on platelet function and inflammation in patients undergoing coronary arterial stenting. *Am J Cardiol* **103**, 1546-1550 (2009).

37. Vivekananthan, D.P., Bhatt, D.L., Chew, D.P., Zidar, F.J., Chan, A.W., Moliterno, D.J., Ellis, S.G. & Topol, E.J. Effect of clopidogrel pretreatment on periprocedural rise in C-reactive protein after percutaneous coronary intervention. *Am J Cardiol* **94**, 358-360 (2004).

38. Chen, Y.G., Xu, F., Zhang, Y., Ji, Q.S., Sun, Y., Lu, R.J. & Li, R.J. Effect of aspirin plus clopidogrel on inflammatory markers in patients with non-ST-segment elevation acute coronary syndrome. *Chin Med J (Engl)* **119**, 32-36 (2006).

39. Klinkhardt, U., Graff, J. & Harder, S. Clopidogrel, but not abciximab, reduces platelet leukocyte conjugates and P-selectin expression in a human ex vivo in vitro model. *Clin Pharmacol Ther* **71**, 176-185 (2002).

40. Vallance, T.M., Zeuner, M.T., Williams, H.F., Widera, D. & Vaiyapuri, S. Toll-Like Receptor 4 Signalling and Its Impact on Platelet Function, Thrombosis, and Haemostasis. *Mediators Inflamm* **2017**, 9605894 (2017).

41. Larson, M.C., Luthi, M.R., Hogg, N. & Hillery, C.A. Calcium-phosphate microprecipitates mimic microparticles when examined with flow cytometry. *Cytometry A* **83**, 242-250 (2013).
42. Mahmood, T. & Yang, P.C. Western blot: technique, theory, and trouble shooting. *N Am J Med Sci* **4**, 429-434 (2012).
43. Aslam, R., Speck, E.R., Kim, M., Crow, A.R., Bang, K.W., Nestel, F.P., Ni, H., Lazarus, A.H., Freedman, J. & Semple, J.W. Platelet Toll-like receptor expression modulates lipopolysaccharide-induced thrombocytopenia and tumor necrosis factor- $\alpha$  production in vivo. *Blood* **107**, 637-641 (2006).
44. Hally, K., Fauteux-Daniel, S., Hamzeh-Cognasse, H., Larsen, P. & Cognasse, F. Revisiting Platelets and Toll-Like Receptors (TLRs): At the Interface of Vascular Immunity and Thrombosis. *Int J Mol Sci* **21**(2020).
45. Joo, S.J. Mechanisms of Platelet Activation and Integrin  $\alpha$ IIb $\beta$ 3. *Korean Circ J* **42**, 295-301 (2012).
46. Kattlove, H. & Gomez, M.H. Collagen-induced platelet aggregation: the role of adenine nucleotides and the release reaction. *Thromb Diath Haemorrh* **34**, 795-805 (1975).
47. Falker, K., Lange, D. & Presek, P. ADP secretion and subsequent P2Y<sub>12</sub> receptor signalling play a crucial role in thrombin-induced ERK2 activation in human platelets. *Thromb Haemost* **92**, 114-123 (2004).
48. Huang, J., Li, X., Shi, X., Zhu, M., Wang, J., Huang, S., Huang, X., Wang, H., Li, L., Deng, H., Zhou, Y., Mao, J., Long, Z., Ma, Z., Ye, W., Pan, J., Xi, X. & Jin, J. Platelet integrin  $\alpha$ IIb $\beta$ 3: signal transduction, regulation, and its therapeutic targeting. *J Hematol Oncol* **12**, 26 (2019).
49. Goto, S., Tamura, N., Ishida, H. & Ruggeri, Z.M. Dependence of platelet thrombus stability on sustained glycoprotein IIb/IIIa activation through adenosine 5'-diphosphate receptor stimulation and cyclic calcium signaling. *J Am Coll Cardiol* **47**, 155-162 (2006).
50. Tomaiuolo, M., Brass, L.F. & Stalker, T.J. Regulation of Platelet Activation and Coagulation and Its Role in Vascular Injury and Arterial Thrombosis. *Interv Cardiol Clin* **6**, 1-12 (2017).
51. Zhang, G., Han, J., Welch, E.J., Ye, R.D., Voyno-Yasenetskaya, T.A., Malik, A.B., Du, X. & Li, Z. Lipopolysaccharide stimulates platelet secretion and potentiates platelet aggregation via TLR4/MyD88 and the cGMP-dependent protein kinase pathway. *J Immunol* **182**, 7997-8004 (2009).
52. Schoergenhofer, C., Schwameis, M., Hobl, E.L., Ay, C., Key, N.S., Derhaschnig, U., Jilma, B. & Spiel, A.O. Potent irreversible P2Y<sub>12</sub> inhibition does not reduce LPS-induced coagulation activation in a randomized, double-blind, placebo-controlled trial. *Clin Sci (Lond)* **130**, 433-440 (2016).
53. Wadowski, P.P., Weikert, C., Pultar, J., Lee, S., Eichelberger, B., Koppensteiner, R., Lang, I.M., Panzer, S. & Gremmel, T. Ticagrelor Inhibits Toll-Like and Protease-Activated Receptor Mediated Platelet Activation in Acute Coronary Syndromes. *Cardiovasc Drugs Ther* **34**, 53-63 (2020).
54. Wang, X.L., Deng, H.F., Li, T., Miao, S.Y., Xiao, Z.H., Liu, M.D., Liu, K. & Xiao, X.Z. Clopidogrel reduces lipopolysaccharide-induced inflammation and neutrophil-platelet aggregates in an experimental endotoxemic model. *J Biochem Mol Toxicol* **33**, e22279 (2019).

55. Amison, R.T., Arnold, S., O'Shaughnessy, B.G., Cleary, S.J., Ofoedu, J., Idzko, M., Page, C.P. & Pitchford, S.C. Lipopolysaccharide (LPS) induced pulmonary neutrophil recruitment and platelet activation is mediated via the P2Y1 and P2Y14 receptors in mice. *Pulm Pharmacol Ther* **45**, 62-68 (2017).
56. Wang, L., Ostberg, O., Wihlborg, A.K., Brogren, H., Jern, S. & Erlinge, D. Quantification of ADP and ATP receptor expression in human platelets. *J Thromb Haemost* **1**, 330-336 (2003).
57. Baurand, A., Eckly, A., Hechler, B., Kauffenstein, G., Galzi, J.L., Cazenave, J.P., Leon, C. & Gachet, C. Differential regulation and relocalization of the platelet P2Y receptors after activation: a way to avoid loss of hemostatic properties? *Mol Pharmacol* **67**, 721-733 (2005).
58. Golebiewska, E.M. & Poole, A.W. Secrets of platelet exocytosis - what do we really know about platelet secretion mechanisms? *Br J Haematol* (2013).
59. Zhang, X., Qin, J., Zou, J., Lv, Z., Tan, B., Shi, J., Zhao, Y., Ren, H., Liu, M., Qian, M. & Du, B. Extracellular ADP facilitates monocyte recruitment in bacterial infection via ERK signaling. *Cell Mol Immunol* **15**, 58-73 (2018).
60. Rothwell, S.W. & Calvert, V.S. Activation of human platelets causes post-translational modifications to cytoplasmic dynein. *Thromb Haemost* **78**, 910-918 (1997).
61. Thomas, M.R., Outteridge, S.N., Ajjan, R.A., Phoenix, F., Sangha, G.K., Faulkner, R.E., Ecob, R., Judge, H.M., Khan, H., West, L.E., Dockrell, D.H., Sabroe, I. & Storey, R.F. Platelet P2Y12 Inhibitors Reduce Systemic Inflammation and Its Prothrombotic Effects in an Experimental Human Model. *Arterioscler Thromb Vasc Biol* **35**, 2562-2570 (2015).
62. Thomas, M.R. & Storey, R.F. Effect of P2Y12 inhibitors on inflammation and immunity. *Thromb Haemost* **114**, 490-497 (2015).
63. Karshovska, E., Weber, C. & von Hundelshausen, P. Platelet chemokines in health and disease. *Thromb Haemost* **110**, 894-902 (2013).
64. Liverani, E., Rico, M.C., Tsygankov, A.Y., Kilpatrick, L.E. & Kunapuli, S.P. P2Y12 Receptor Modulates Sepsis-Induced Inflammation. *Arterioscler Thromb Vasc Biol* **36**, 961-971 (2016).
65. Liverani, E., Rico, M.C., Yaratha, L., Tsygankov, A.Y., Kilpatrick, L.E. & Kunapuli, S.P. LPS-induced systemic inflammation is more severe in P2Y12 null mice. *J Leukoc Biol* **95**, 313-323 (2014).
66. Evangelista, V., Manarini, S., Dell'Elba, G., Martelli, N., Napoleone, E., Di Santo, A. & Lorenzet, P.S. Clopidogrel inhibits platelet-leukocyte adhesion and platelet-dependent leukocyte activation. *Thromb Haemost* **94**, 568-577 (2005).
67. Sexton, T.R., Zhang, G., Macaulay, T.E., Callahan, L.A., Charnigo, R., Vsevolozhskaya, O.A., Li, Z. & Smyth, S. Ticagrelor Reduces Thromboinflammatory Markers in Patients With Pneumonia. *JACC Basic Transl Sci* **3**, 435-449 (2018).
68. Warlo, E.M.K., Arnesen, H. & Seljeflot, I. A brief review on resistance to P2Y12 receptor antagonism in coronary artery disease. *Thromb J* **17**, 11 (2019).
69. Haberstock-Debic, H., Andre, P., Mills, S., Phillips, D.R. & Conley, P.B. A clopidogrel-insensitive inducible pool of P2Y12 receptors contributes to thrombus formation: inhibition by elinogrel, a direct-acting, reversible P2Y12 antagonist. *J Pharmacol Exp Ther* **339**, 54-61 (2011).



Figure 1

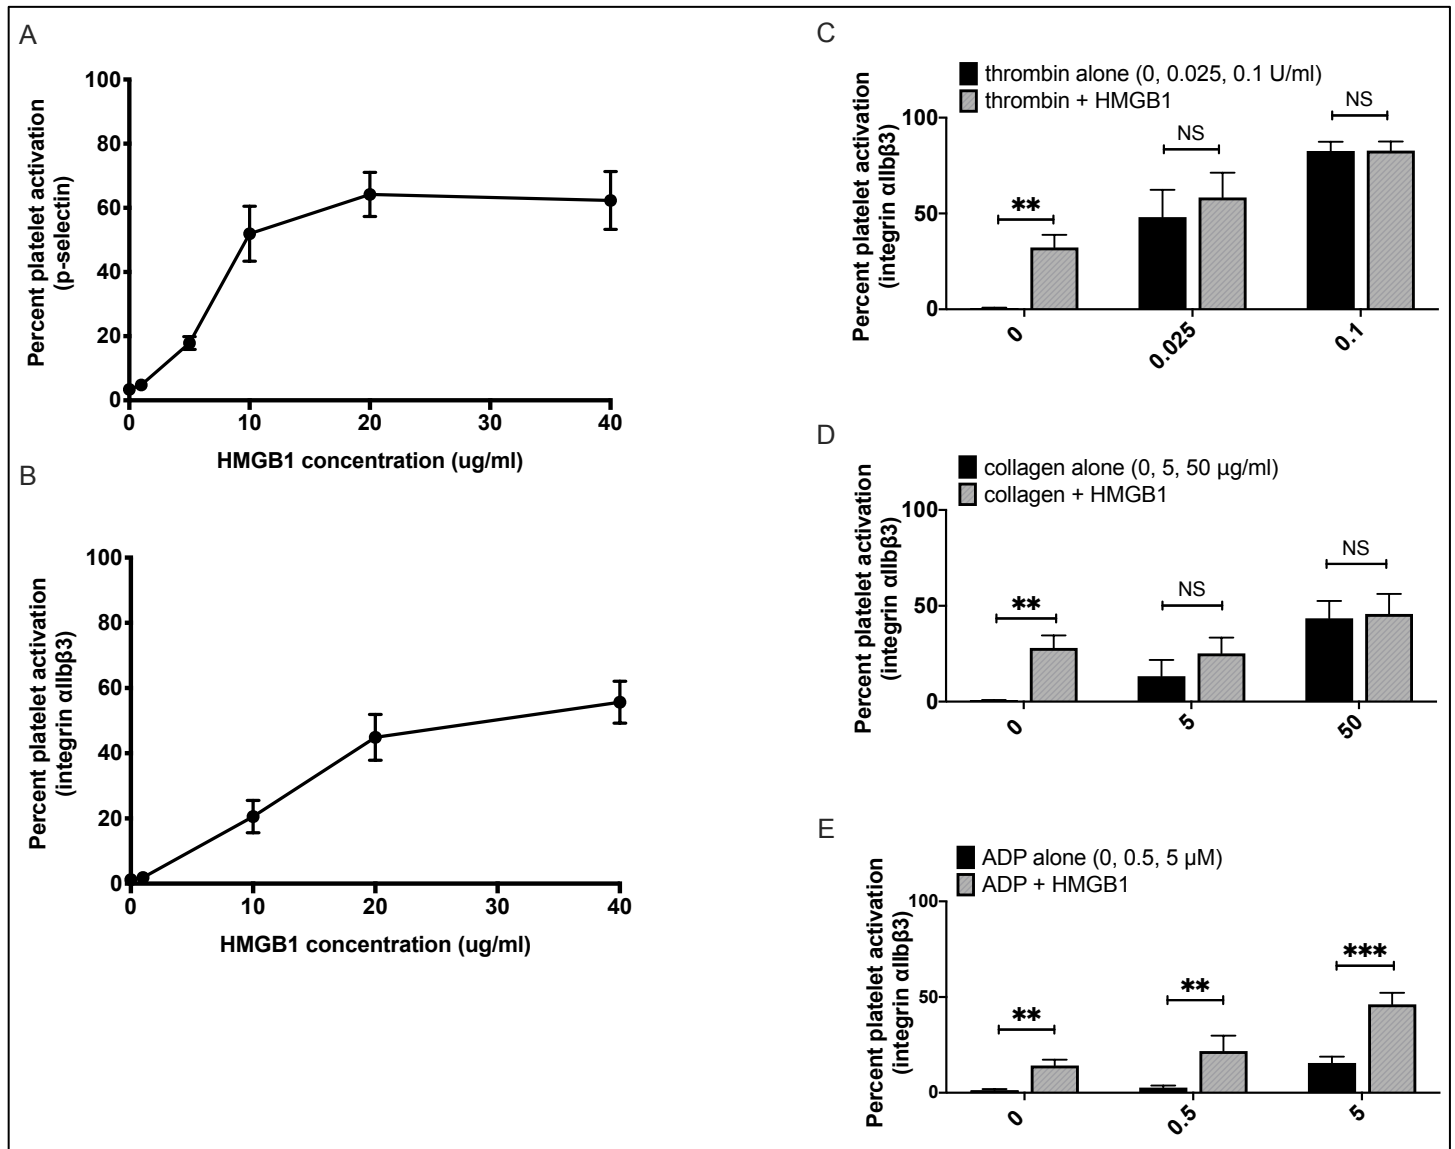

**Figure 1: HMGB1 sensitizes platelets to ADP-dependent platelet activation. (A-B)** Washed human

platelet activation was measured by surface P-selectin expression **(A)** or integrin  $\alpha$ IIb $\beta$ 3 activation-dependent conformational change **(B)** in response to recombinant HMGB1 (0-40 $\mu$ g/ml; 20 min)

( $P < 0.0001$  by one-way ANOVA). Data is  $n = 8$ , mean  $\pm$  SEM.

**(C-E)** Activation of isolated platelets treated with **(C)** collagen, **(D)** thrombin or **(E)** ADP alone (black bars) compared to the same agonist with HMGB1 pre-treatment (10  $\mu$ g/ml; gray bars).  $n = 8$ , data are

mean  $\pm$  SEM. NS = not significant, \*  $P \leq 0.05$ ; \*\*  $P \leq 0.01$ , \*\*\*  $P \leq 0.001$ .

**Figure 2**

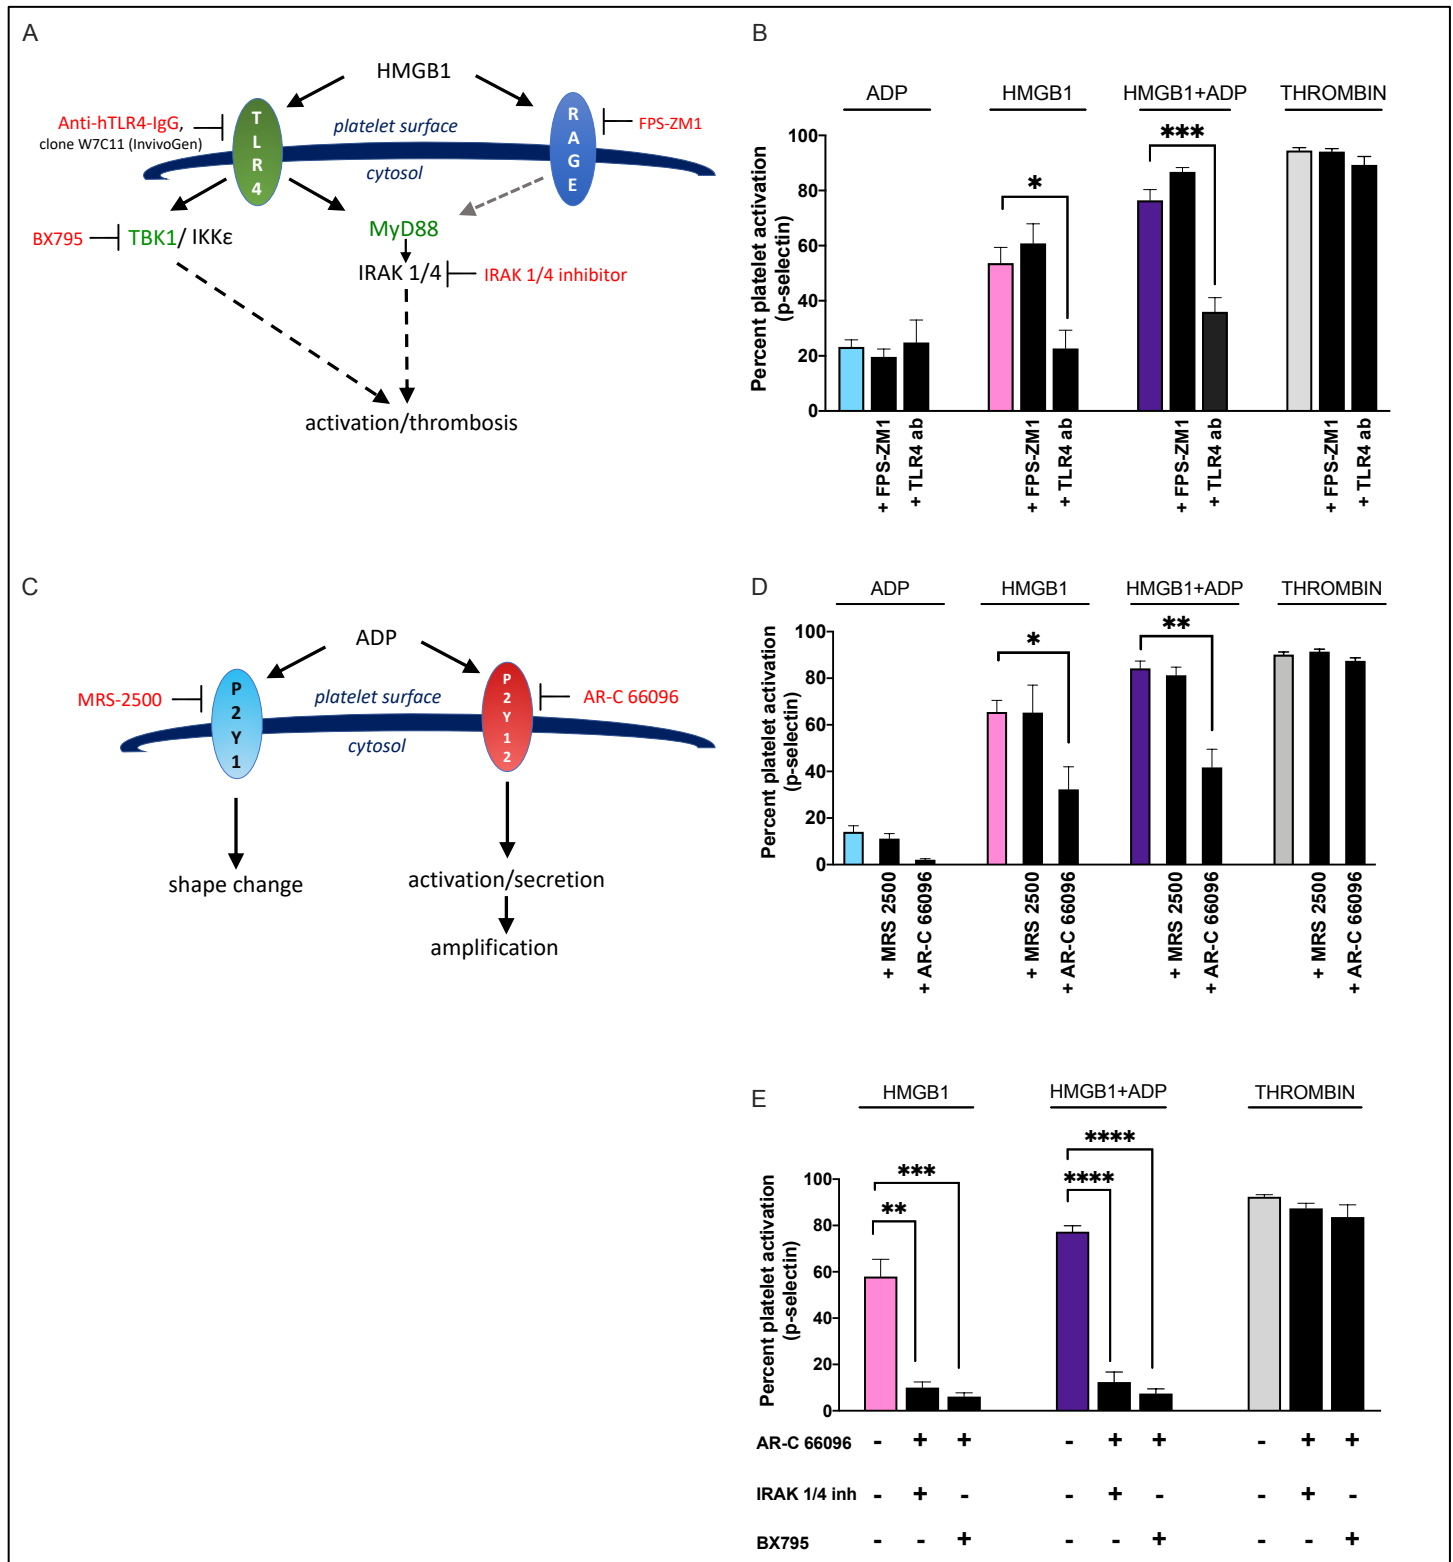

**Figure 2: Inhibition of TLR4 and P2Y<sub>12</sub> attenuates HMGB1-mediated platelet activation. (A)**

HMGB1 engages with TLR4 and RAGE whose intracellular signaling pathways converge downstream at MyD88 and IRAK 1 and 4, while MYD88-independent signaling includes TBK1. Blocking arrows depict where small-molecule inhibitors disrupt the signaling pathways. **(B)** Platelet activation stimulated with ADP (5  $\mu$ M), HMGB1 (10  $\mu$ M), HMGB1+ADP, or thrombin (0.1 U/ml) alone (colored bars and labeled above each bar) and after pre-treatment with FPS-ZMI (25  $\mu$ M) or anti-TLR4 neutralizing antibody (1  $\mu$ g/ml). n=5, data are mean  $\pm$  SEM. **(C)** ADP engages P2Y<sub>1</sub> and P2Y<sub>12</sub> receptors. Blocking arrows depict small-molecule inhibitors MRS-2500 and AR-C 68096 antagonizing specific receptors. **(D)** Platelet activation stimulated by ADP, HMGB1, HMGB1 + ADP, or thrombin alone (colored bars and labeled above bars) or after pre-treatment with MRS 2500 (1 nM) or AR-C 66096 (1  $\mu$ M). n=8, data are mean  $\pm$  SEM. **(E)** Platelet activation stimulated by HMGB1, HMGB1 + ADP, or thrombin in the presence of inhibition of the P2Y<sub>12</sub> receptor with AR-C 66096 (1  $\mu$ M) and simultaneous inhibition of downstream TLR4 signaling with IRAK 1/4 inhibitor (0.1  $\mu$ M) or BX795 (TBK1 inhibitor, 2  $\mu$ M). n=4, data are mean  $\pm$  SEM.

NS = not significant, \*  $P \leq 0.05$ ; \*\*  $P \leq 0.01$ , \*\*\*  $P \leq 0.001$ , \*\*\*\* $P \leq 0.0001$ .

Figure 3

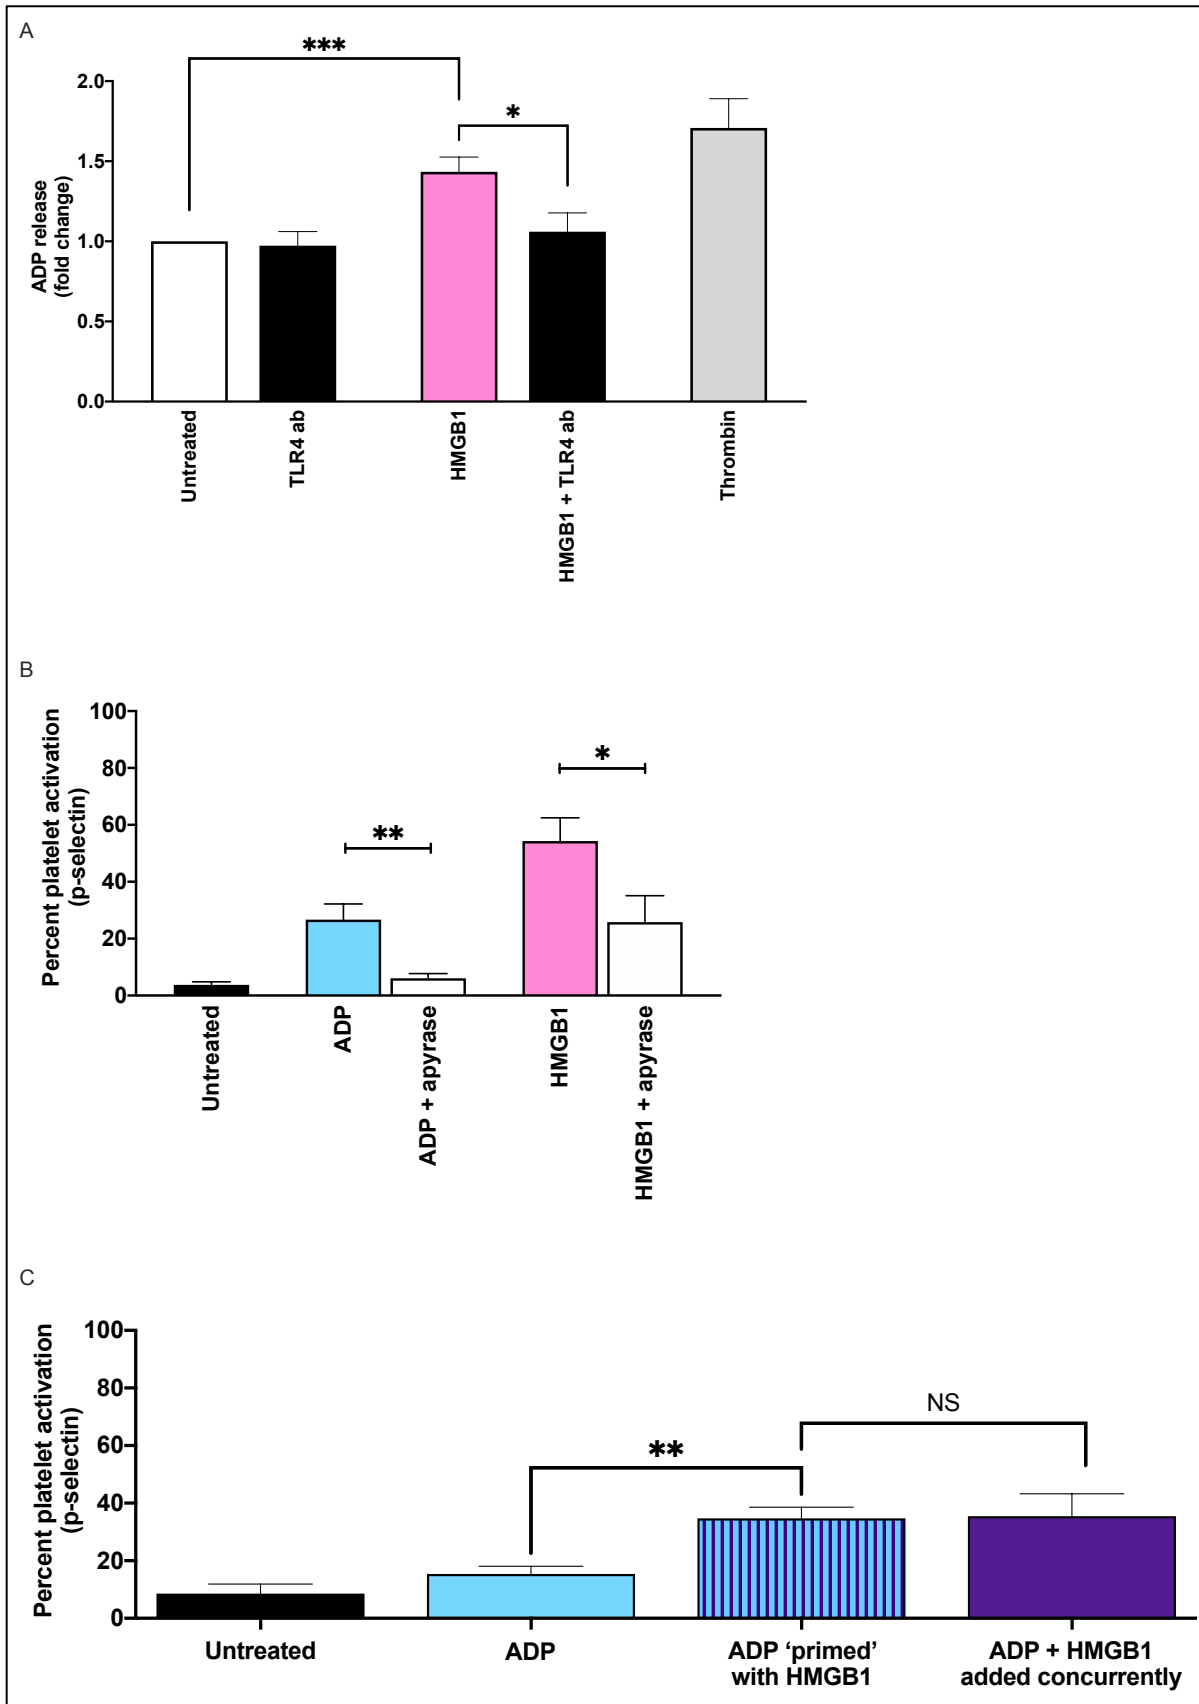

**Figure 3: Endogenous ADP release contributes to HMGB1-dependent platelet activation. (A)**

ADP released by platelets in response to treatment with HMGB1 (10 µg/ml) and in the presence and absence of pre-treatment with TLR4 neutralizing antibody (1 µg/ml) or with thrombin (0.1 U/ml). n=4, data are mean ± SEM. **(B)** Platelet activation stimulated by ADP (5 µM, blue bar) or HMGB1 (10 µg/ml, pink bar), alone or in the presence of apyrase (0.02 U/ul; white bars). n=5, data are mean ± SEM. **(C)** Platelet activation in response to no treatment (black bar), ADP alone (5 µM, blue bar), compared to priming with HMGB1 (10 µg/ml) for 20 minutes prior to washing and adding ADP (striped bar), or treatment with HMGB1+ADP concurrently (purple bar). n=6, data are mean ± SEM. \* P ≤ 0.05; \*\* P ≤ 0.01, \*\*\* P ≤ 0.001.

## Figure 4

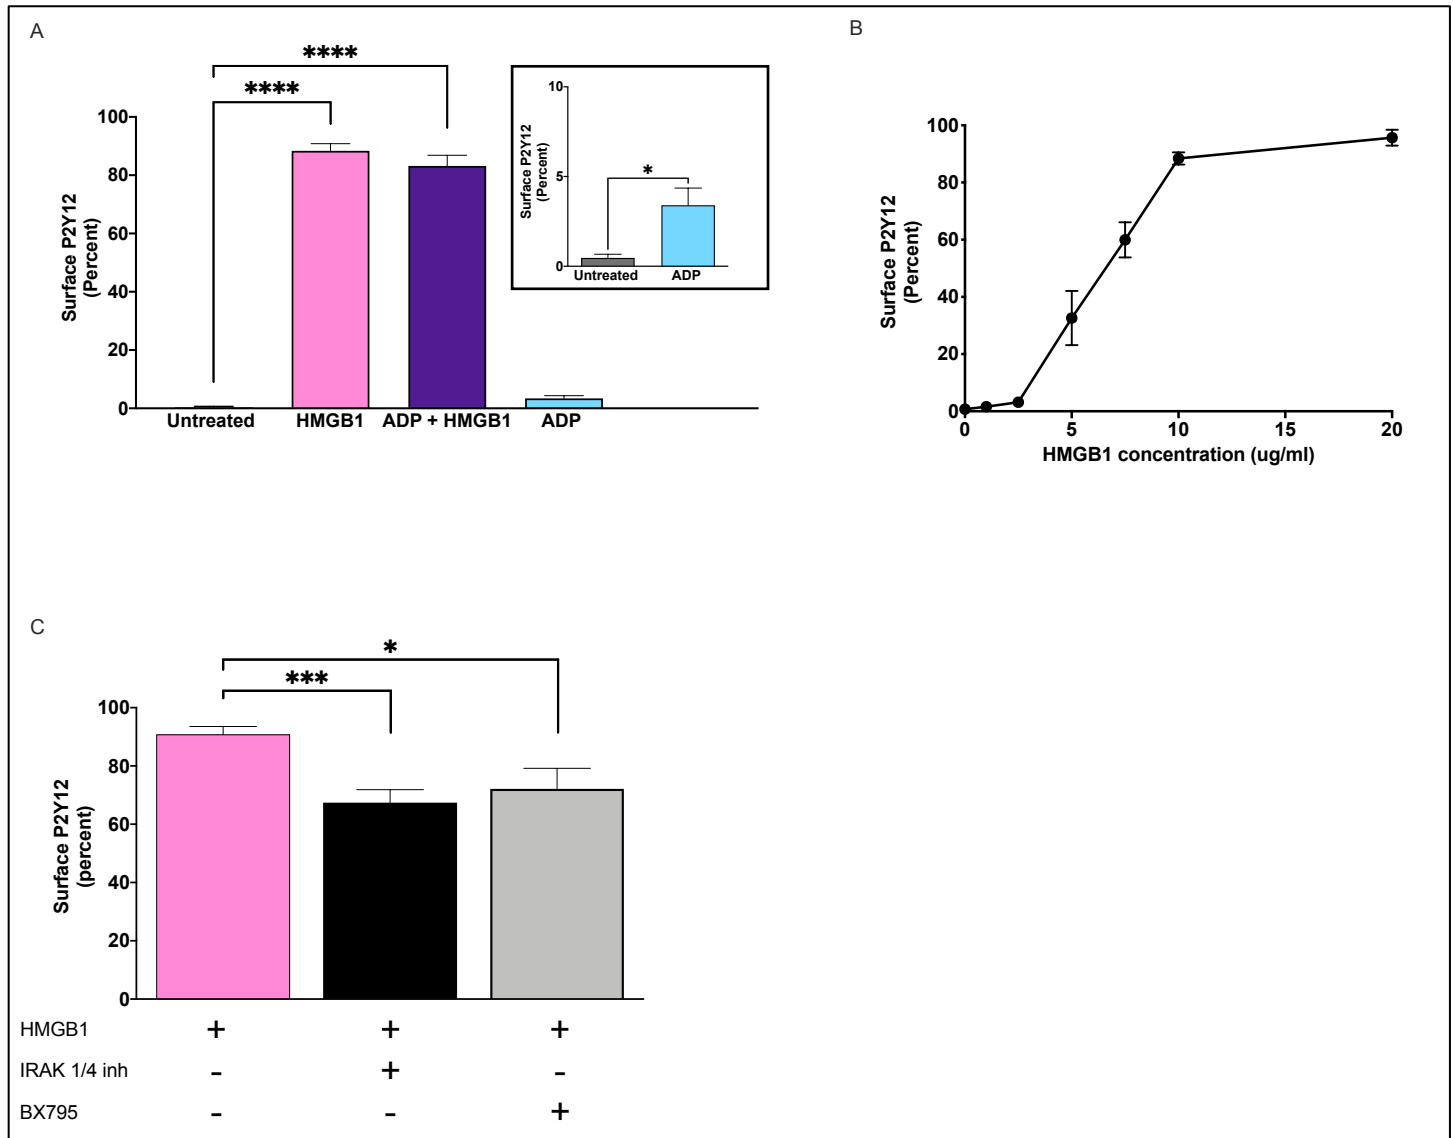

**Figure 4: HMGB1 increases P2Y<sub>12</sub> localization on the platelet surface. (A)** Platelet surface expression of P2Y<sub>12</sub> was assessed by flow cytometry after treatment with no agonist (untreated), HMGB1 (10 µg/ml), ADP alone (5 µM) (pictured inset) or HMGB1+ADP (5 µM), n=6. **(B)** P2Y<sub>12</sub> surface expression in response to increasing concentrations of HMGB1 (P<0.0001 by one-way ANOVA), n=3. **(C)** Surface P2Y<sub>12</sub> levels after HMGB1 (10 µg/ml) treatment in the presence and absence of IRAK 1/4 inhibitor (0.1 µM) or TBK1 inhibitor (BX795, 2 µM). n=5, data are mean ± SEM. \*P ≤ 0.05; \*\* P ≤ 0.01, \*\*\* P ≤ 0.001.

**Figure 5**

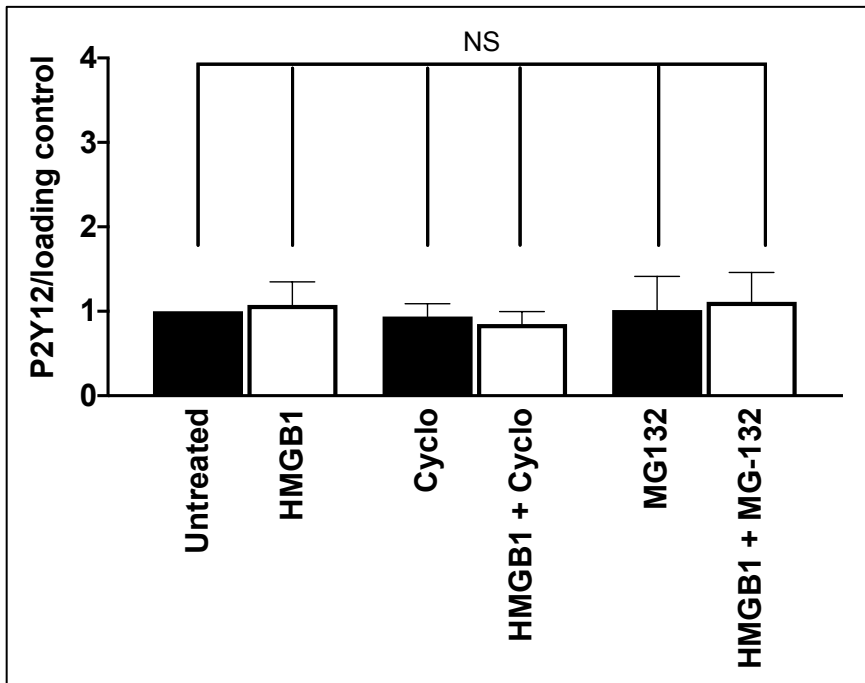

**Figure 5: HMGB1 does not change platelet P2Y<sub>12</sub> synthesis or degradation.** Western blot quantification of P2Y<sub>12</sub> levels in the platelet after treatment with cycloheximide (Cyclo, 20  $\mu$ M) or MG-132 (30  $\mu$ M) in the presence and absence of HMGB1 treatment (10  $\mu$ g/ml). Total platelet P2Y<sub>12</sub> levels are displayed relative to each lane's loading control (either vinculin or GAPDH). n=4, data are mean  $\pm$  SEM. \* P  $\leq$  0.05; \*\* P  $\leq$  0.01, \*\*\* P  $\leq$  0.001.

**Figure 6**

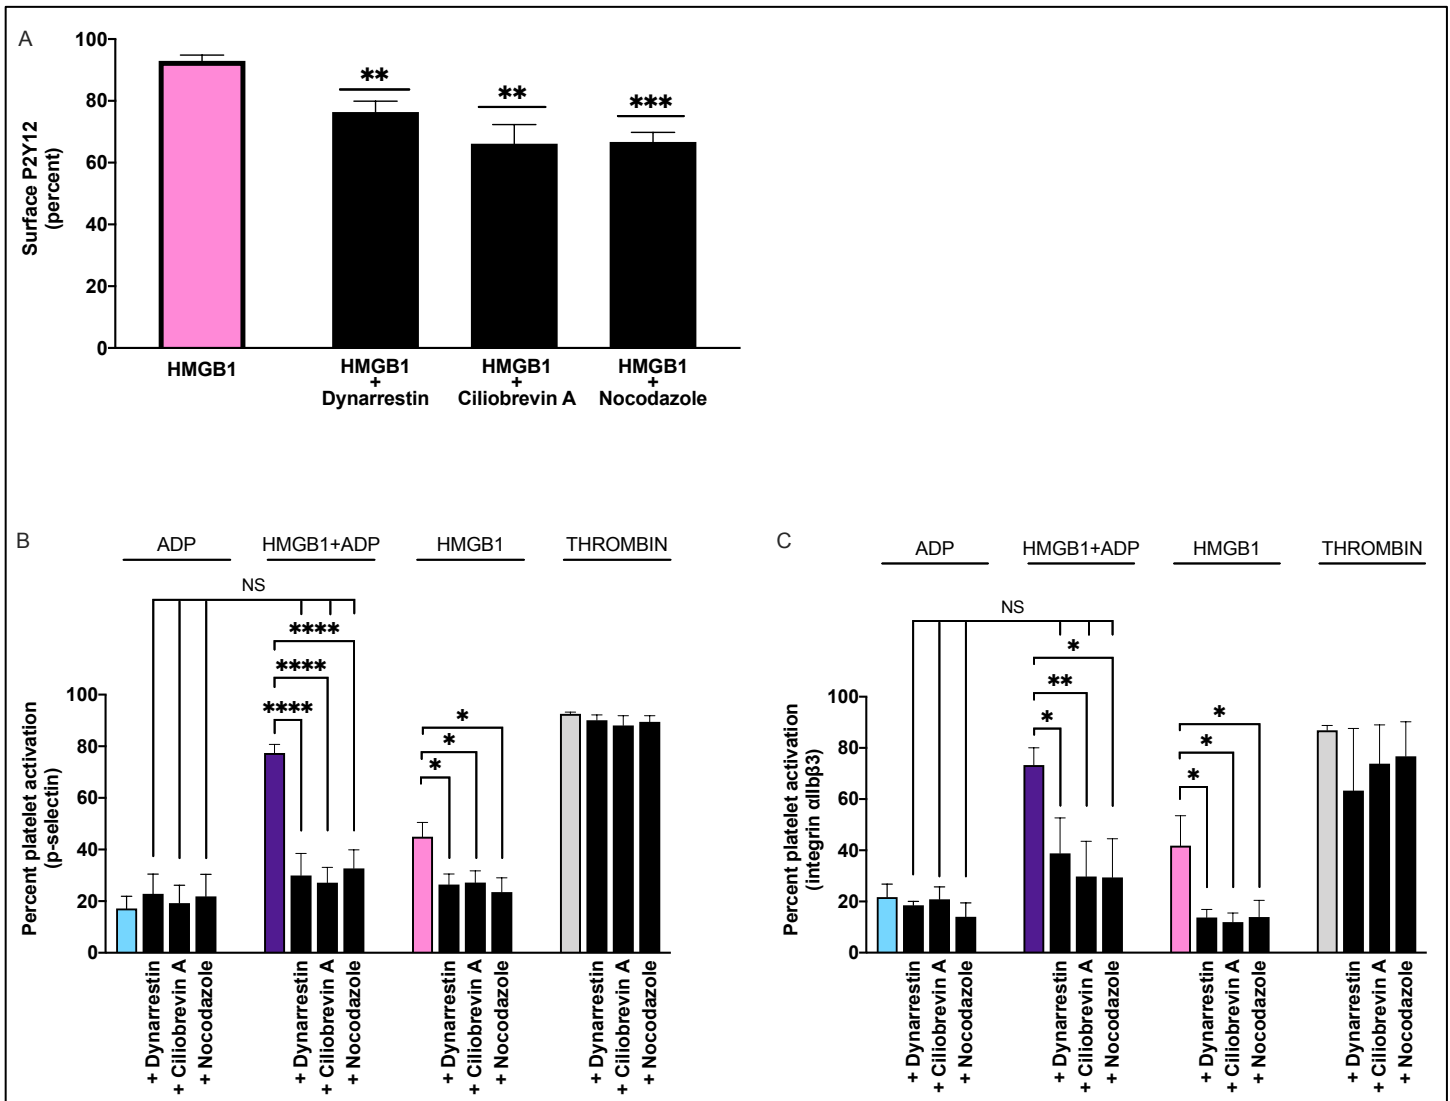

**Figure 6: Cytoplasmic trafficking inhibitors attenuate surface P2Y<sub>12</sub> expression and priming effect of HMGB1.** (A) Platelet P2Y<sub>12</sub> surface levels (n=5) and platelet activation (n=4) measured by (B) surface P-selectin expression or (C) integrin αIIbβ<sub>3</sub> in response to pre-treating platelets with dynarrestin (50 μM), ciliobrevin A (10 μM), or nocodazole (2 μM) prior to HMGB1 treatment (10 μg/ml). Data are mean ± SEM. \* P ≤ 0.05; \*\* P ≤ 0.01, \*\*\* P ≤ 0.001.



## Supplementary Figure

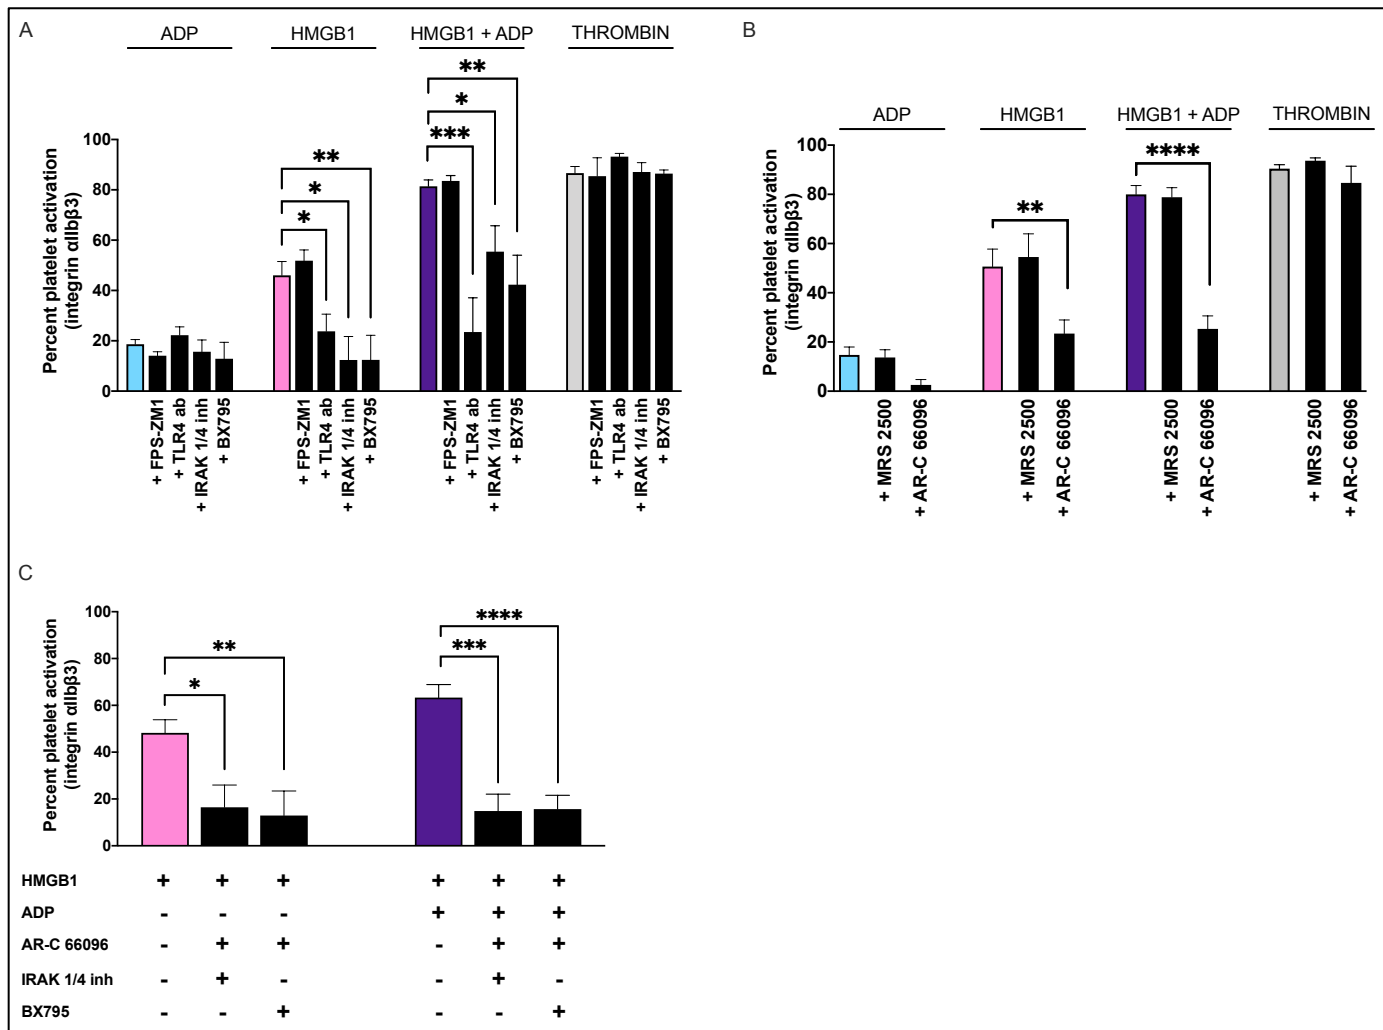

**Supplementary Figure: TLR4 and purinergic receptor inhibitors attenuate HMGB1-dependent activated integrin  $\alpha IIb\beta 3$  in human platelets. (A)** Platelet activation stimulated with HMGB1 alone (10  $\mu\text{g/ml}$ ), ADP alone (5  $\mu\text{M}$ ), HMGB1+ADP, or thrombin alone and after pre-treatment with FPS-ZMI (25  $\mu\text{M}$ ), anti-TLR4 neutralizing antibody (1  $\mu\text{g/ml}$ ), IRAK 1/4 inhibitor (0.1  $\mu\text{M}$ ) or BX795 (2  $\mu\text{M}$ ).  $n=3$ . **(B)** Platelet activation stimulated by ADP, HMGB1, HMGB1 + ADP, or thrombin alone (colored bars) or after pre-treatment with MRS 2500 (1 nM) or AR-C 66096 (1  $\mu\text{M}$ ).  $n=4$ , data are mean  $\pm$  SEM. **(C)** Platelet activation stimulated by HMGB1 alone (pink bar) or HMGB1+ADP (purple bar) while antagonizing the  $P2Y_{12}$  receptor with AR-C 66096 (1  $\mu\text{M}$ ) while simultaneously inhibiting TLR4 signaling with IRAK 1/4 inhibitor (0.1  $\mu\text{M}$ ) or BX795 (TBK1 inhibitor, 2  $\mu\text{M}$ ).  $n=4$ , data are mean  $\pm$  SEM. \*  $P \leq 0.05$ ; \*\*  $P \leq 0.01$ , \*\*\*  $P \leq 0.001$ .

## Visual Abstract:

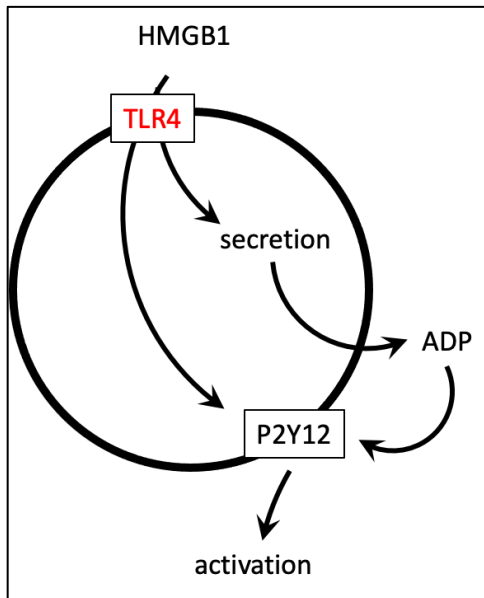

**Caption:** HMGB1 activates TLR4 to activate platelets, release platelet ADP, and upregulate P2Y<sub>12</sub> at the platelet surface.
